# Supplementary material for: Antibody responses against SARS-CoV-2 variants induced by four different SARS-CoV-2 vaccines
Source: bioRxiv or medRxiv preprint supplement (doi:10.1101/2021.09.27.21264163), 2022-03-25
Supplement: Supplementary file [file media-1.pdf]

## Supplementary Materials for

### Four SARS-CoV-2 vaccines induce quantitatively different antibody responses against SARS-CoV-2 variants

Marit J. van Gils<sup>1\*</sup>, A. H. Ayesha Lavell<sup>2#</sup>, Karlijn van der Straten<sup>1,3#</sup>, Brent Appelman<sup>4#</sup>, Ilja Bontjer<sup>1</sup>, Meliawati Poniman<sup>1</sup>, Judith A. Burger<sup>1</sup>, Melissa Oomen<sup>1</sup>, Joey H. Bouhuijs<sup>1</sup>, Marleen A. Slim<sup>5</sup>, Michiel Schinkel<sup>4</sup>, Lonneke A. van Vught<sup>3,6</sup>, Elke Wynberg<sup>1,5</sup>, Hugo D.G. van Willigen<sup>1</sup>, Marloes Grobben<sup>1</sup>, Khadija Tejjani<sup>1</sup>, Jonne Snitselaar<sup>1</sup>, Tom G. Caniels<sup>1</sup>, Amsterdam UMC COVID-19 S3/HCW study group, Alexander P. J. Vlaar<sup>6</sup>, Maria Prins<sup>3,5</sup>, Menno D. de Jong<sup>1</sup>, Godelieve J. de Bree<sup>4</sup>, Jonne J. Sikkens<sup>2,4\*</sup>, Marije K. Bomers<sup>2\*</sup>, Rogier W. Sanders<sup>1,7\*</sup>

Correspondence to: [r.w.sanders@amsterdamumc.nl](mailto:r.w.sanders@amsterdamumc.nl), [m.bomers@amsterdamumc.nl](mailto:m.bomers@amsterdamumc.nl), [j.sikkens@amsterdamumc.nl](mailto:j.sikkens@amsterdamumc.nl), [m.j.vangils@amsterdamumc.nl](mailto:m.j.vangils@amsterdamumc.nl)

#### **This PDF file includes:**

Figure S1 to S3

Table S1 to S3

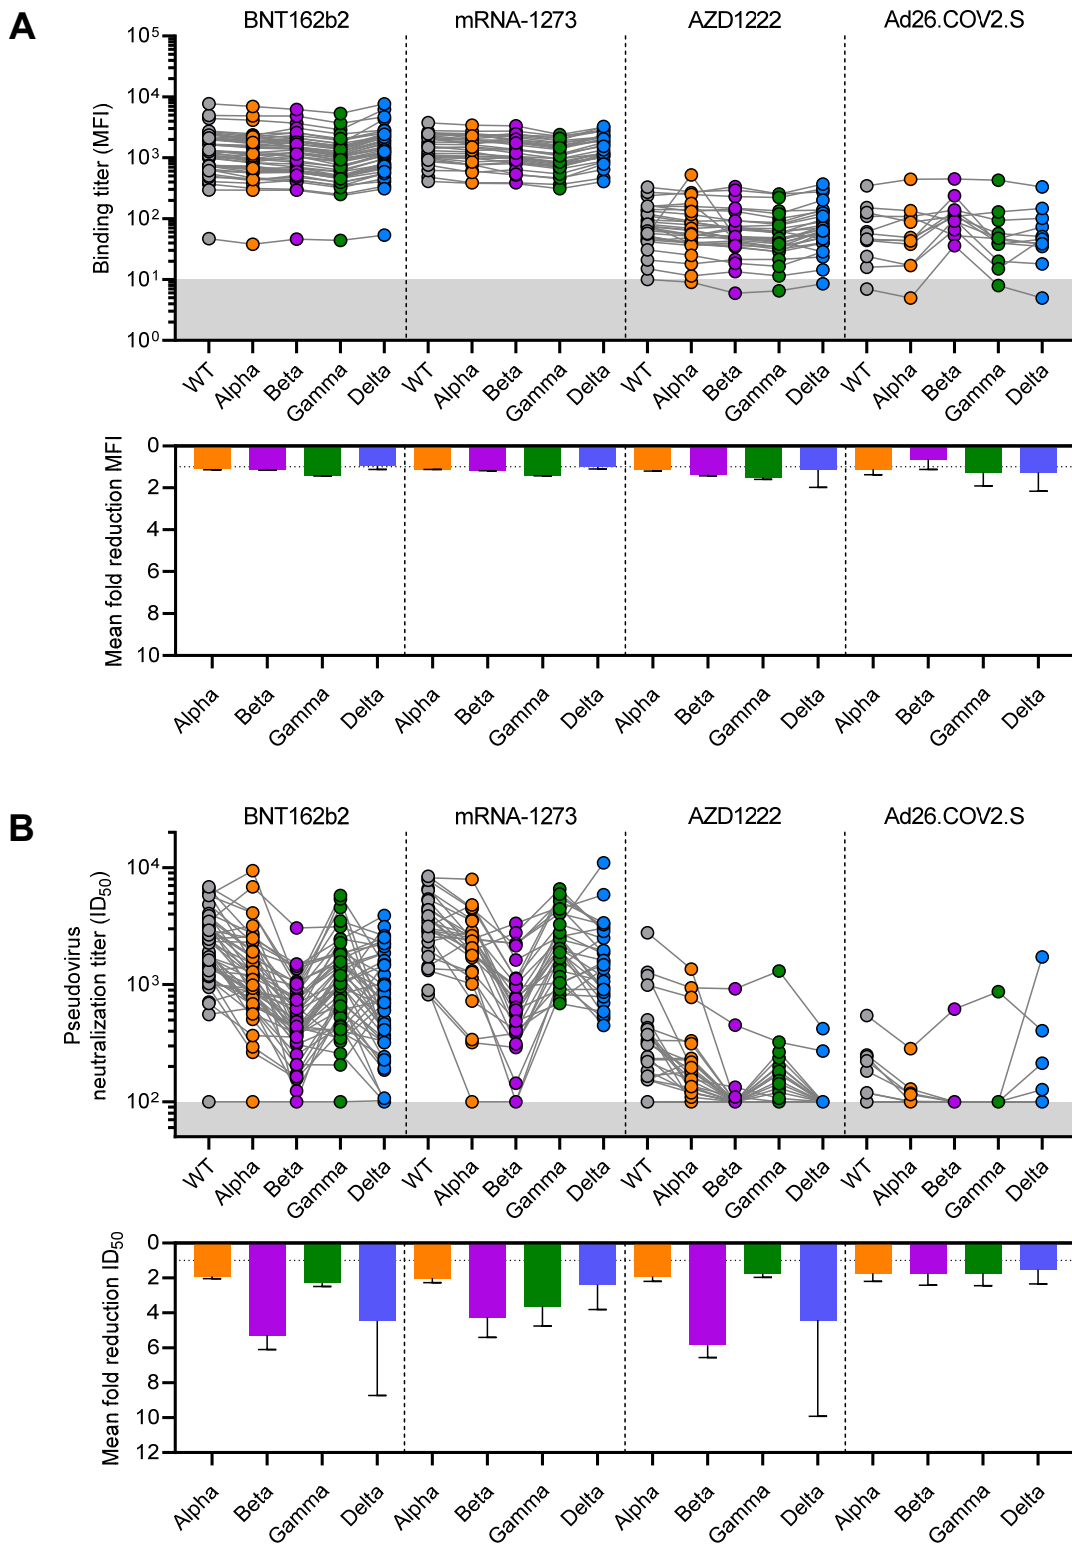

**Figure S1: Binding and neutralization titers post-vaccination against the VOCs.** (A) Paired binding titers to wild-type and VOCs S protein represented as mean fluorescence intensity (MFI) of 1:100,000 diluted sera collected post full vaccination for the four vaccination groups (upper plot). The lower cutoff for binding was set at an MFI of 10 (grey shading). Mean  $\pm$  SEM fold reductions in binding MFI against the VOCs in comparison to wild-type (lower plot). (B) Paired half-maximal neutralization ( $ID_{50}$ ) titers of D614G and VOCs pseudoviruses for sera collected post full vaccination for the four vaccination groups (upper plot). Mean  $\pm$  SEM fold reductions in  $ID_{50}$  titers against the VOCs pseudoviruses in comparison to  $ID_{50}$  titers against D614G pseudovirus.

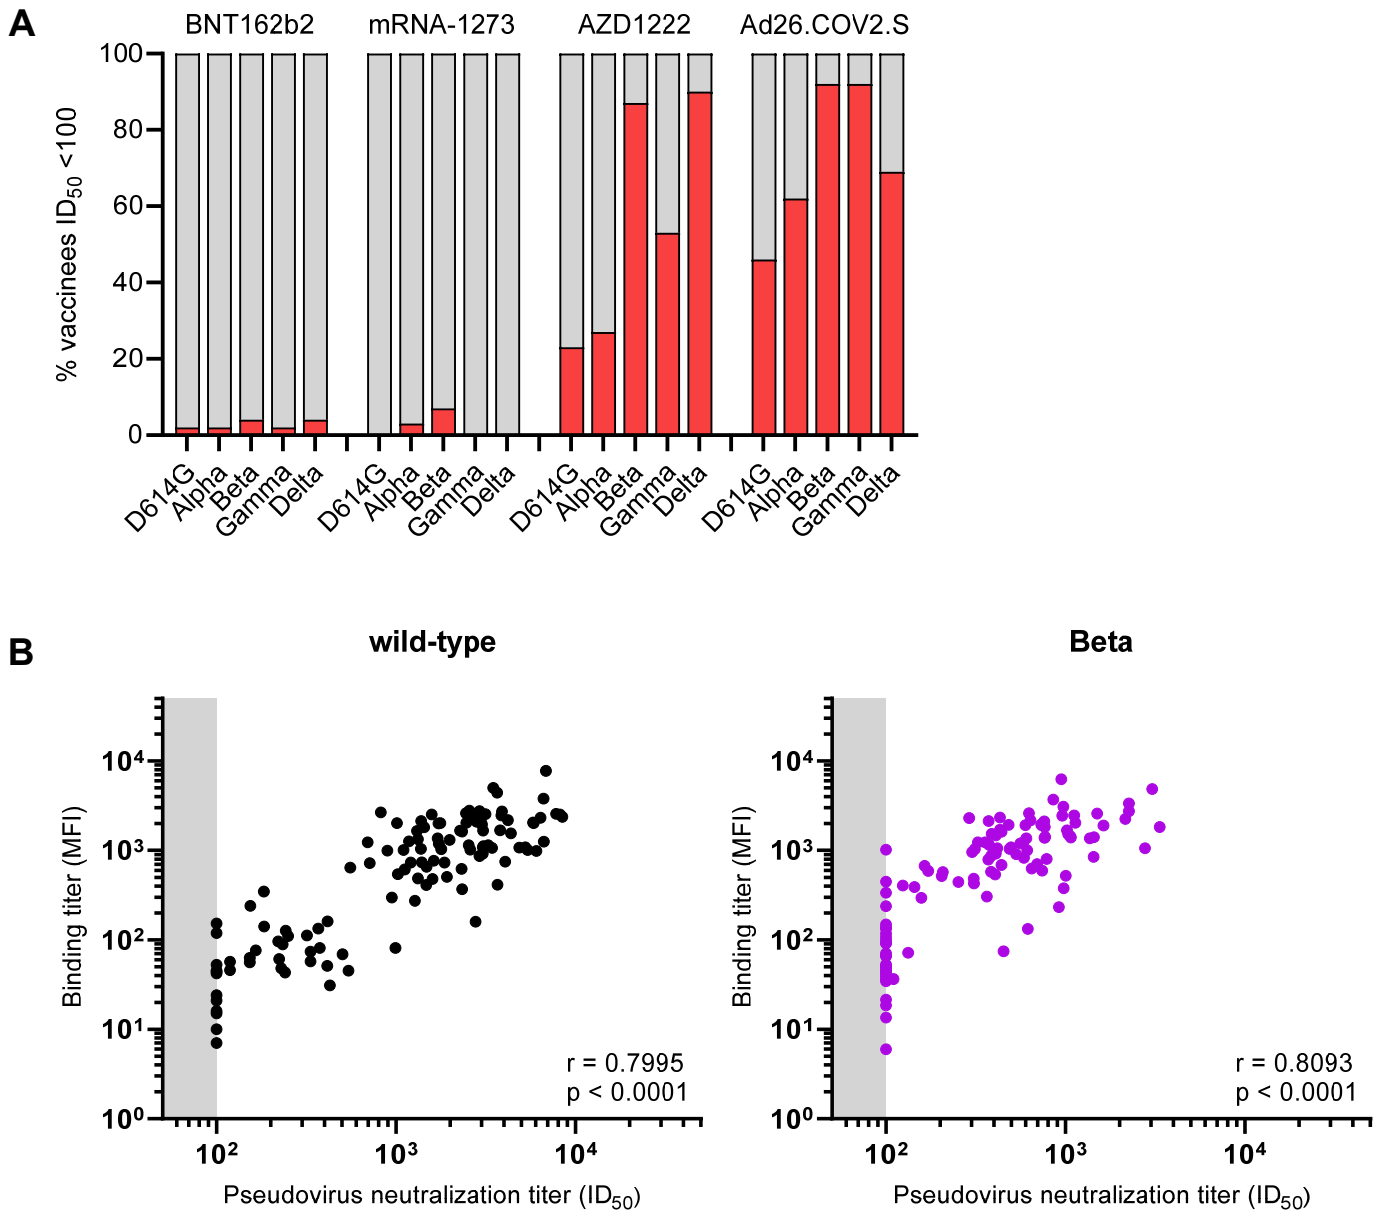

**Figure S2: Binding and neutralization against VOCs.** (A) Percentage of individuals (in red) in each of the vaccine groups that have no detectable serum neutralizing activity ( $ID_{50} < 100$ ) against the indicated pseudoviruses. (B) Correlation between wild-type and Beta binding (MFI) and neutralization titers ( $ID_{50}$ ). Spearman's rank correlation coefficient with p value are indicated.

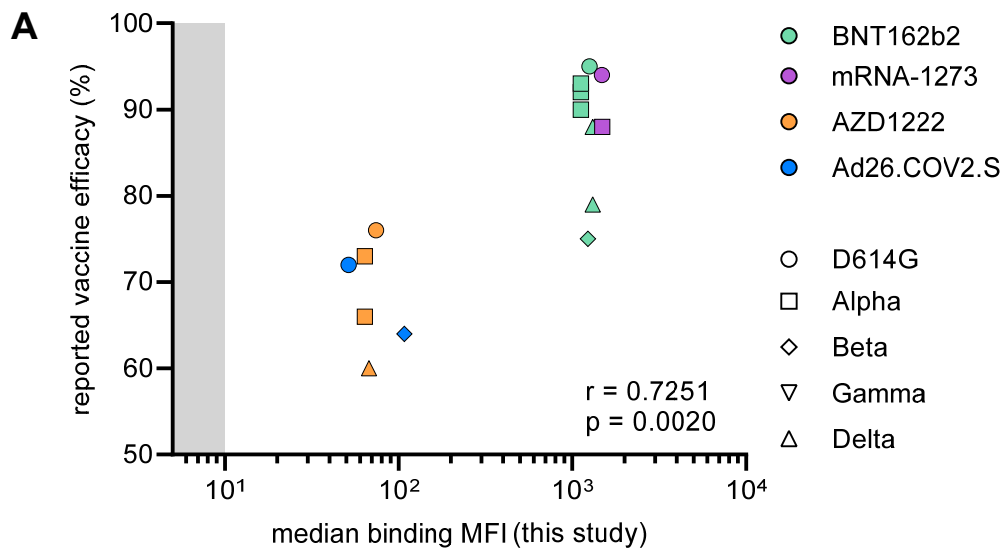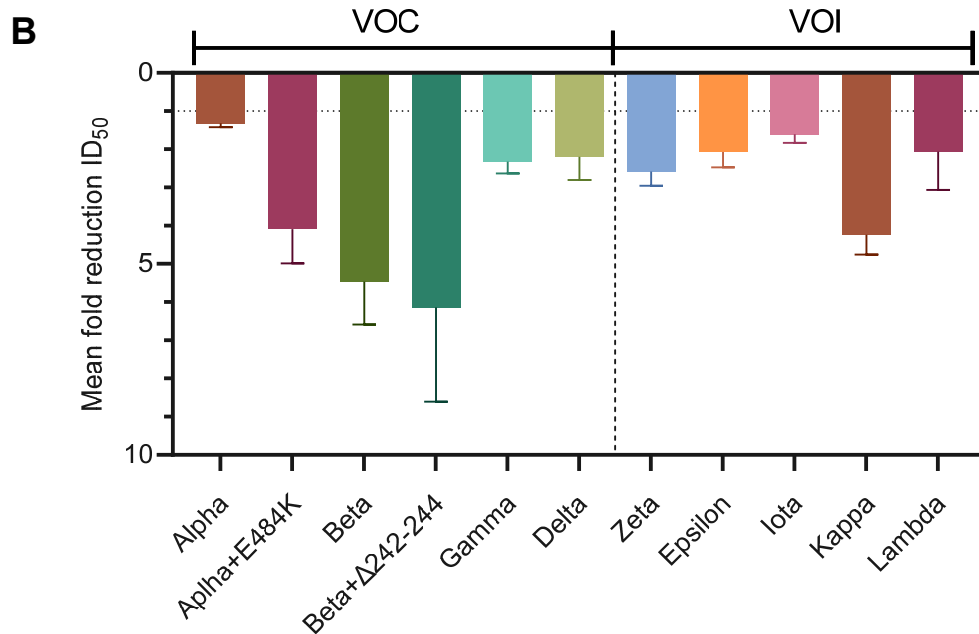

**Figure S3: Binding and neutralization titers post-vaccination against VOCs and VOIs.** (A) Median binding MFI of wild-type and VOCs plotted against the reported vaccine efficacy against symptomatic infection (REFS). Vaccine groups are indicated by colors with BNT162b2 in green, mRNA-1273 in purple, AZD1222 in orange and Ad26.COV2.S in blue. Circles represent WT data, squares for Alpha, nabla triangle for Gamma and delta triangle for Delta. Spearman's rank correlation coefficient with p value are indicated. The poor (10%) efficacy of AZD1222 against the Beta variant in the phase 3 trial conducted in South-Africa was not included (REF). MFI, mean fluorescence intensity. (B) Mean  $\pm$  SEM fold reductions in ID<sub>50</sub> titers for the serum pools combined against the VOCs and VOIs pseudoviruses in comparison to ID<sub>50</sub> titers against D614G pseudovirus.

**Table S1: Number of participants included in the binding or neutralization assay per time point per vaccine group.**

|             |              | <b>Binding</b> | <b>Neutralization</b> |
|-------------|--------------|----------------|-----------------------|
| BNT162b2    | pre-vac      | 49             | 0                     |
|             | post-prime   | 46             | 45                    |
|             | post-boost   | 50             | 50                    |
| mRNA-1273   | pre-vac      | 24             | 0                     |
|             | post-prime   | 40             | 30                    |
|             | post-boost   | 33             | 29                    |
| AZD1222     | pre-vac      | 20             | 0                     |
|             | post-prime   | 41             | 34                    |
|             | post-boost   | 31             | 30                    |
| Ad26.COVS.S | pre-vac      | 7              | 0                     |
|             | post-prime   | 12             | 13                    |
|             | post-prime 2 | 12             | 13                    |

**Table S2: Individual MFI and ID50 titers per vaccine group.**

Can be found in a separate extended data file

**Table S3: Pseudovirus S constructs contain the following mutations compared to the WT (Wuhan Hu-1; GenBank: MN908947.3).**

|              | <b>VOC</b>                                                                     |                                                                                                   |                                                                                               |                                                                                |                                                                                                        |                                                                                 |
|--------------|--------------------------------------------------------------------------------|---------------------------------------------------------------------------------------------------|-----------------------------------------------------------------------------------------------|--------------------------------------------------------------------------------|--------------------------------------------------------------------------------------------------------|---------------------------------------------------------------------------------|
| <b>D614G</b> | <b>Alpha</b>                                                                   | <b>Alpha E484K</b>                                                                                | <b>Beta</b>                                                                                   | <b>Beta Δ242-244</b>                                                           | <b>Gamma</b>                                                                                           | <b>Delta</b>                                                                    |
| B.1          | B.1.1.7                                                                        | B.1.1.7                                                                                           | B.1.351                                                                                       | B.1.351                                                                        | P.1                                                                                                    | B.1.617.2                                                                       |
| D614G        | Δ69-70<br>Δ144<br>N501Y<br>A570D<br>D614G<br>P681H<br>T716I<br>S982A<br>D1118H | Δ69-70<br>Δ144<br>E484K<br>N501Y<br>A570D<br>D614G<br>P681H<br>T716I<br>S982A<br>D1118H<br>D1118H | L18F<br>D80A<br>D215G<br>L242H<br>R246I<br>K417N<br>E484K<br>N501Y<br>D614G<br>D614G<br>A701V | L18F<br>D80A<br>D215G<br>Δ242-244<br>K417N<br>E484K<br>N501Y<br>D614G<br>A701V | L18F<br>T20N<br>P26S<br>D138Y<br>R190S<br>K417T<br>E484K<br>N501Y<br>D614G<br>D614G<br>H655Y<br>T1027I | T19R<br>G142D<br>E156G<br>Δ157-158<br>L452R<br>T478K<br>D614G<br>P681R<br>D950N |

| <b>VOC</b>                      |                          |                                                 |                                                                      |                                                                       |
|---------------------------------|--------------------------|-------------------------------------------------|----------------------------------------------------------------------|-----------------------------------------------------------------------|
| <b>Epsilon</b>                  | <b>Zeta</b>              | <b>Iota</b>                                     | <b>Kappa</b>                                                         | <b>Lambda</b>                                                         |
| B.1.429                         | P.2                      | B.1.526                                         | B.1.617.1                                                            | C.37                                                                  |
| S13I<br>W152C<br>L452R<br>D614G | E484K<br>D614G<br>V1176F | L5F<br>T95I<br>D253G<br>E484K<br>D614G<br>A701V | T95I<br>G142D<br>E154K<br>L452R<br>E484Q<br>D614G<br>P681R<br>Q1071H | G75V<br>T76I<br>Δ246-252<br>D253N<br>L452Q<br>F490S<br>D614G<br>T859N |
